# Supplementary material
Source: publisher figshare collection journal article supplement (https://acs.figshare.com/ndownloader/files/4718812)
Supplement: Supplementary file 1 [file 4718812]

## Supporting Information

### Defect Site Promoted Surface Re-organization in Nanocrystalline Ceria for the Low Temperature Activation of Ethylbenzene

B. Murugan, and A. V. Ramaswamy\*

*Department of Chemistry, University of Pune, Pune 411007, India*

#### Synthesis of Ceria samples:

Ceria-A sample was prepared by the dissolution of  $\text{Ce}(\text{NO}_3)_3 \cdot 6\text{H}_2\text{O}$  in an aqueous ethanolic solution followed by slow precipitation using dilute  $\text{NH}_3$  (2%) at pH 7. The hydroxide gel formed was stirred at 353 K for 3 h, as the solvent evaporated. The solid obtained was dried at 393 K for 12 h and calcined at 723 K for 4 h. The other ceria samples (ceria-P, ceria-U and ceria-G) were prepared as per procedure given in Ref. 4.

#### Electron Paramagnetic Resonance Spectroscopy:

EPR measurements were conducted on a Bruker EMX X-band spectrometer ( $\nu \approx 9.4$  GHz) operating at a 100 kHz field modulation. The ceria sample ( $\sim 80$  mg) was taken in a specially designed quartz EPR cell (o.d.= 4 mm) fitted with greaseless stopcocks and having a provision for adsorption and desorption of gases.

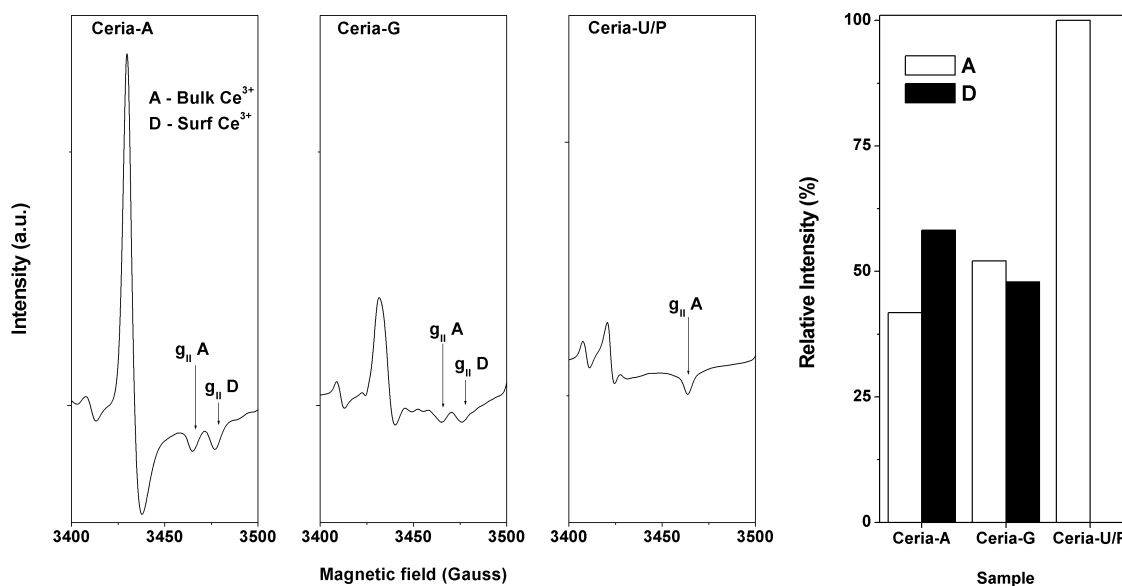

**Figure S1.** Electron paramagnetic resonance spectra of ceria samples prepared by various routes. The spectra are recorded at 298 K under atmospheric pressure. The relative intensity in percentage of the  $g_{||}$  signals corresponding to A ( $\text{Ce}^{3+}$  ions in the bulk of the solid, stabilized by some lattice defects) and D ( $\text{Ce}^{3+}$  ions with easily removable ligands, prominently on the surface) is also presented. The surface to bulk defect ratio follows the order Ceria-A > Ceria-G > Ceria-U/P.

### Temperature programmed reduction:

Temperature-programmed reduction (TPR) experiments were performed on a Micromeritics Autochem 2910 instrument. A weighed amount of the sample (~125 mg) was placed in a quartz reactor, pretreated in a flow of Ar (99%) at 773 K for 1 h and cooled to 298 K. A gas mixture of H<sub>2</sub> (5%)-Ar (95%) was then allowed to flow (25 ml min<sup>-1</sup>) through the reactor. The temperature was raised to 973 K at a heating rate of 10 K.min<sup>-1</sup>. A thermal conductivity detector (TCD) attached at the outlet of the reactor provided a measure of the volume of hydrogen consumed during the reduction experiments.

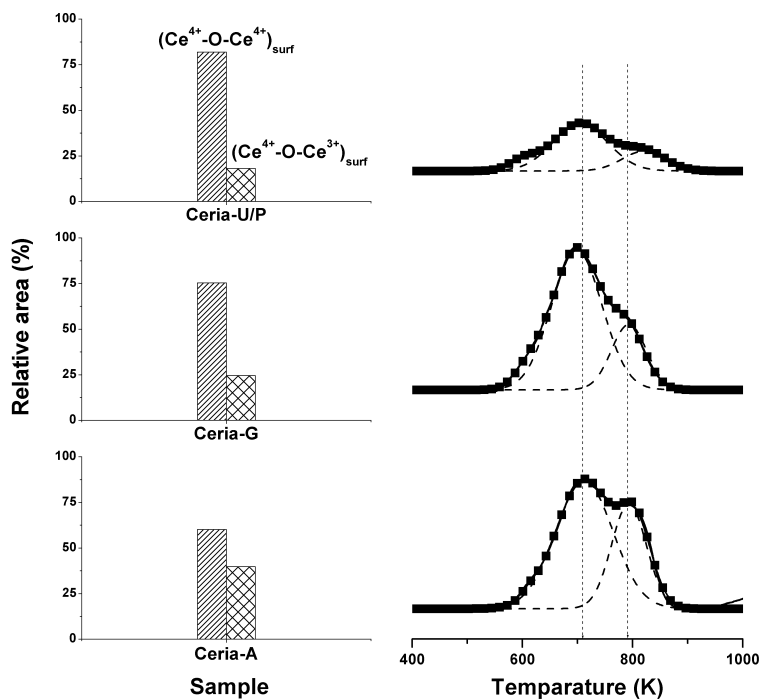

**Figure S2.** Temperature programmed reduction profile of ceria samples prepared by various methods. The relative area in percentage of the reduction peaks corresponding to surface  $\text{Ce}^{4+}\text{-O-Ce}^{4+}$  and  $\text{Ce}^{4+}\text{-O-Ce}^{3+}$  type species is also plotted. The plot clearly indicates the surface enrichment of defective  $\text{Ce}^{4+}\text{-O-Ce}^{3+}$  type species in the case of ceria samples prepared by alcoholysis method.

**Proposed reaction mechanism:**

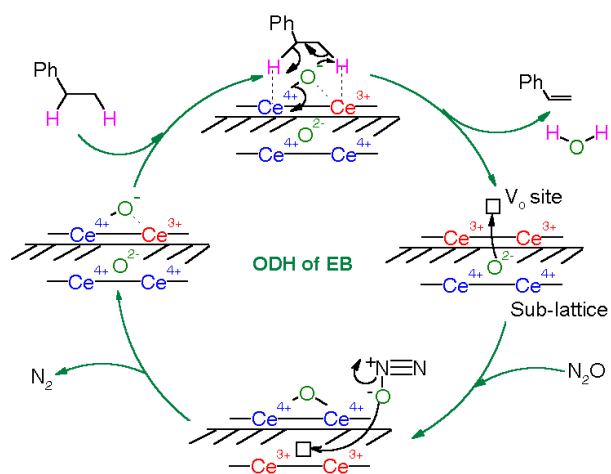

**Scheme S1.** Catalytic pathway for the oxidative dehydrogenation of ethylbenzene using N<sub>2</sub>O as oxidant and ceria as the catalyst.
